# Supplementary material for: Two-step dielectric anomalies coupled with structural phase transitions in a co-crystal of 1,4-diazabicyclo[2.2.2]octane and 4,4′-biphenol
Source: Royal Society of Chemistry journal article supplement (doi:10.1039/c4ra03681f), 2014-01-01
Supplement: c4ra03681f1.pdf [file c4ra03681f1.pdf]

## **Two-step dielectric anomalies coupled with structural phase transitions in co-crystal of 1,4-diazabicyclo[2.2.2]octane and 4, 4'-biphenol**

Wei-Hua Ning,<sup>a,b</sup> Lu Zhai<sup>a,b</sup> and Xiao-Ming Ren<sup>\*a,b,c</sup>

<sup>a</sup> State Key Laboratory of Materials-Oriented Chemical Engineering and College of Science, Nanjing University of Technology, Nanjing 210009

<sup>b</sup> College of Materials Science and Engineering, Nanjing University of Technology, Nanjing 210009

<sup>c</sup> Coordination Chemistry Institute & State Key Laboratory, Nanjing University, Nanjing 210093

Tel.: +86 25 58139476

Fax: +86 25 58139481

Email: [xmren@njtech.edu.cn](mailto:xmren@njtech.edu.cn)

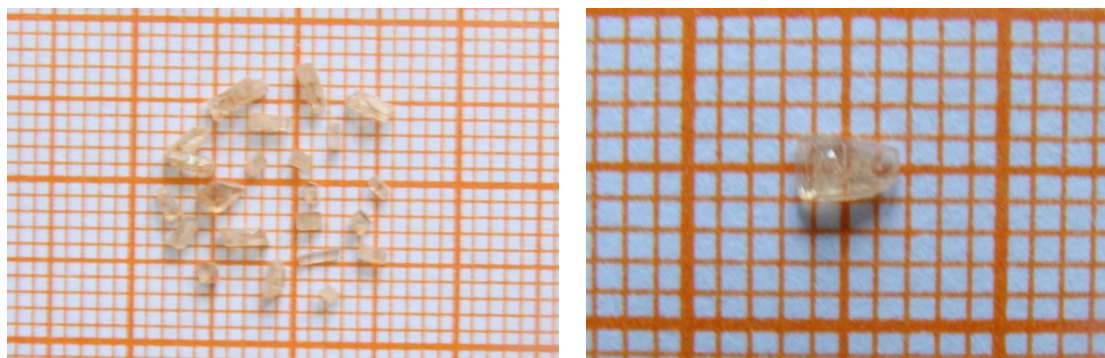

Figure S1 Colorless crystals of **1** (left) and one crystal selected for the dielectric constant measurement (right, which dimensions are  $3.0 \times 2.0 \times 1.5 \text{ mm}^3$ ).

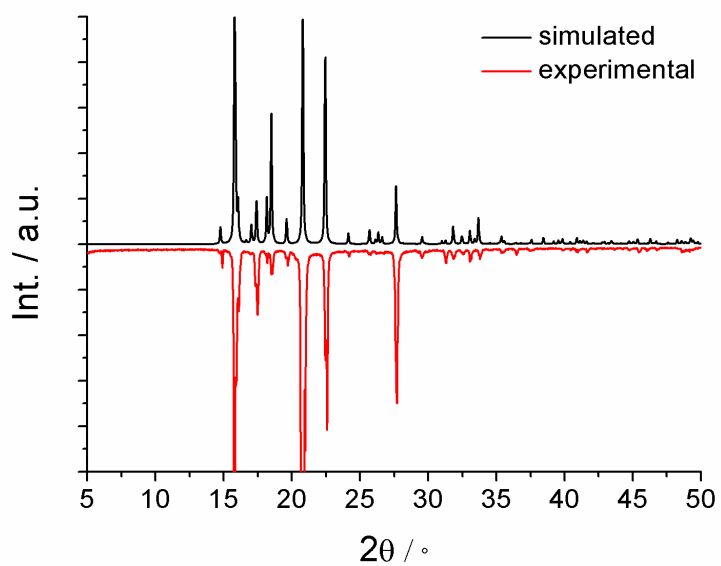

Figure S2 PXRD plots of **1** at ambient temperature (red line: experimental profile and black line: simulated profile).

Sample: PABCO  
Size: 14.0700 mg

DSC

File: E:\DSCQ2000\duan haibao\PABCO-1231.001  
Operator: ding  
Run Date: 02-Jan-2014 14:40  
Instrument: DSC Q2000 V24.10 Build 122

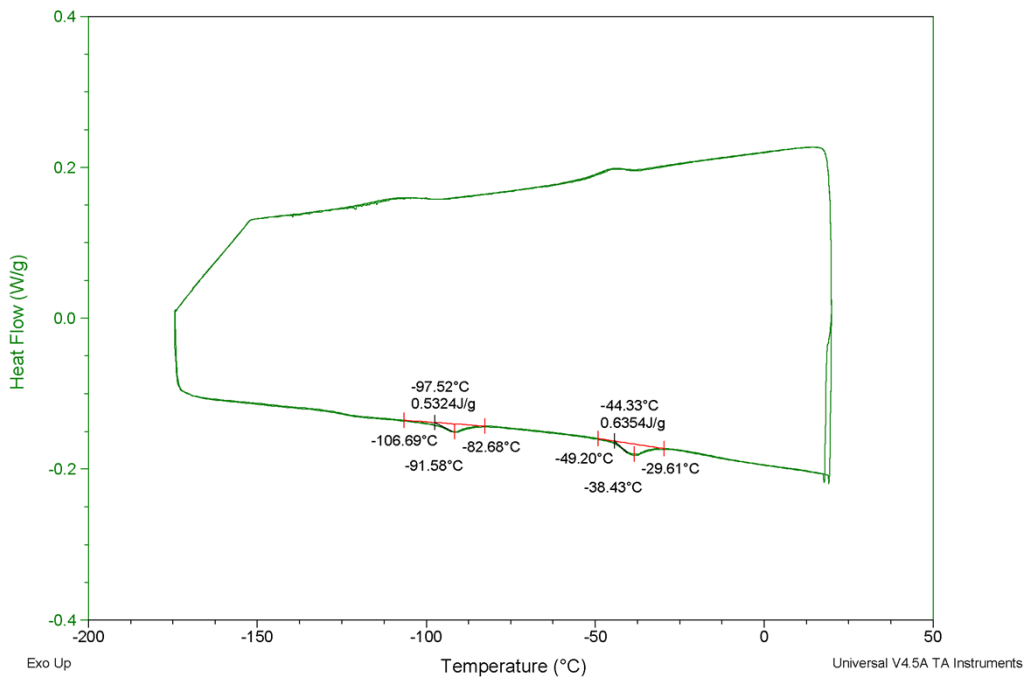

Figure S3 DSC plot of 1.

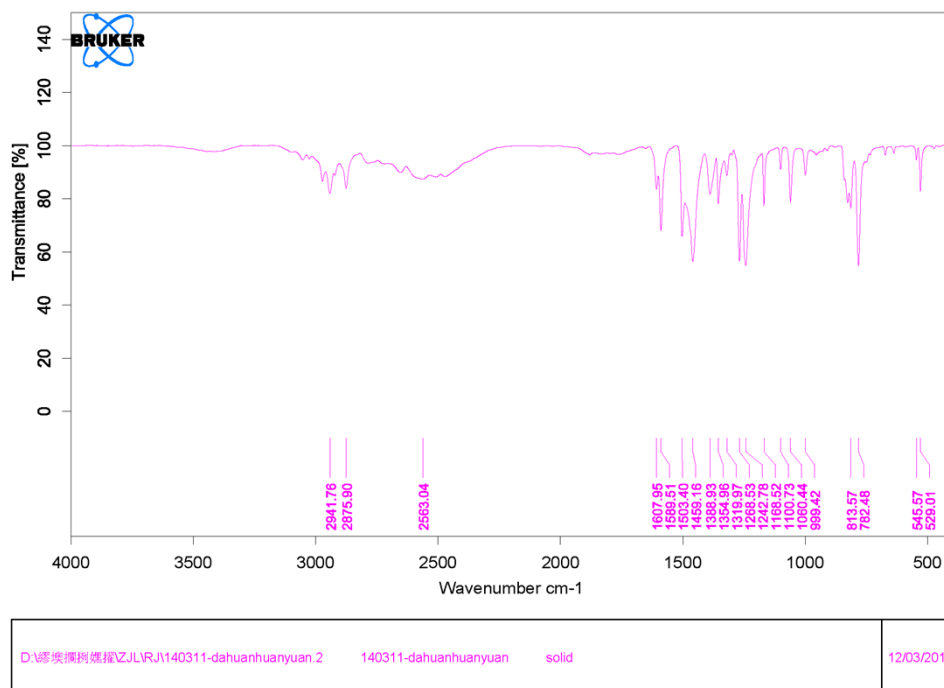

D:\谱库\谱图\JLRJ140311-dahuanhuanyuan.2 140311-dahuanhuanyuan solid 12/03/2014

Figure S4 IR spectrum of 1.

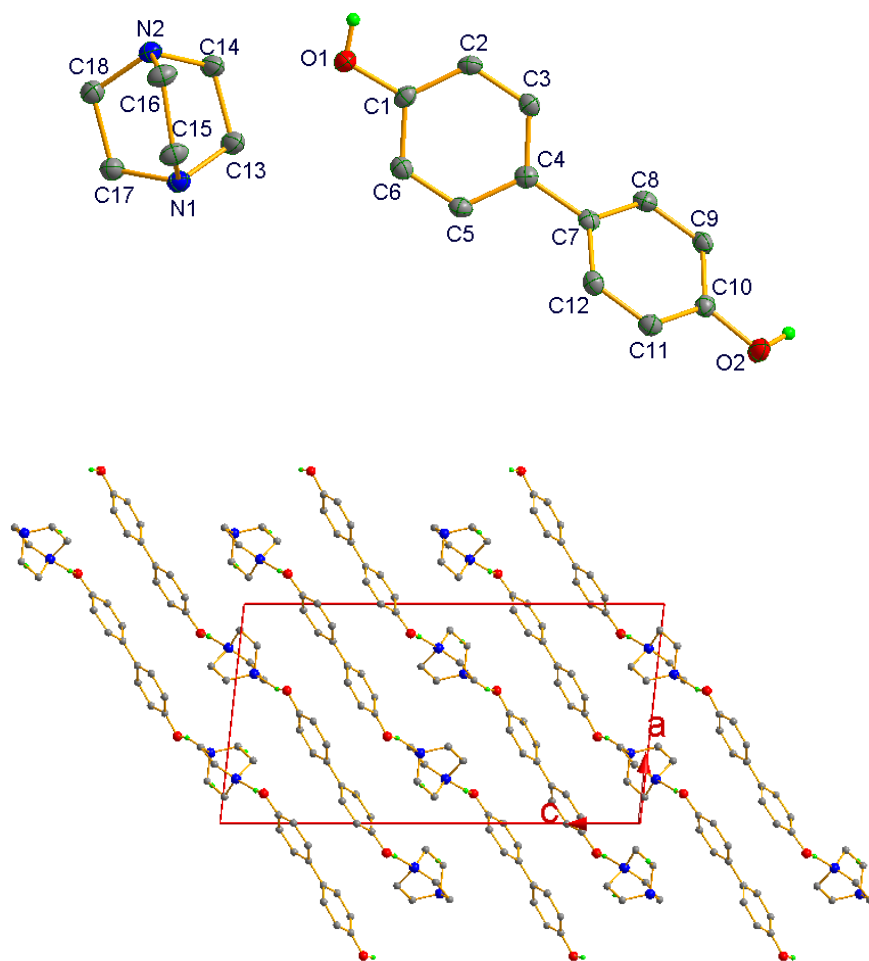

Figure S5 (a) Molecular structure of **1** with non-hydrogen atoms labeling and displacement ellipsoids at the 10% probability level in LT phase, where hydrogen atoms besides in OH groups as well as one disordered DABCO molecule are omitted for clarity (b) packing structure viewed along *b*-axis.

Table S1 Bond distances and angles of co-crystal **1** in HT, IT and LT phases

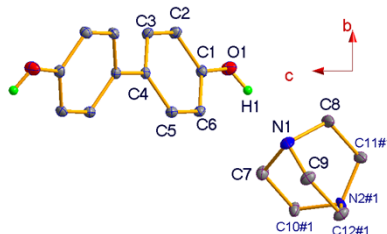

| Temperature = 296 K (HT phase) |            | Temperature = 200 K (IT phase) |            |
|--------------------------------|------------|--------------------------------|------------|
| O(1)-C(1)                      | 1.3598(16) | O(1)-C(1)                      | 1.352(3)   |
| C(1)-C(6)                      | 1.3849(19) | C(1)-C(6)                      | 1.391(4)   |
| C(1)-C(2)                      | 1.3849(19) | C(1)-C(2)                      | 1.387(3)   |
| C(2)-C(3)                      | 1.3763(17) | C(2)-C(3)                      | 1.370(3)   |
| C(3)-C(4)                      | 1.3957(18) | C(3)-C(4)                      | 1.397(3)   |
| C(4)-C(5)                      | 1.3924(17) | C(4)-C(5)                      | 1.394(3)   |
| C(4)-C(4)#1                    | 1.483(2)   | C(4)-C(4)#1                    | 1.483(5)   |
| C(5)-C(6)                      | 1.3816(17) | C(5)-C(6)                      | 1.374(3)   |
| N(1)-C(7)                      | 1.394(18)  | N(1)-C(7)                      | 1.41(2)    |
| N(1)-C(8)                      | 1.422(17)  | N(1)-C(8)                      | 1.349(14)  |
| N(1)-C(9)                      | 1.62(2)    | N(1)-C(9)                      | 1.67(2)    |
| C(7)-C(10)#2                   | 1.542(4)   | C(7)-C(10)#2                   | 1.540(5)   |
| C(7)-C(8)#2                    | 1.727(5)   | C(7)-C(8)#2                    | 1.788(7)   |
| C(8)-C(11)#2                   | 1.537(5)   | C(8)-C(11)#2                   | 1.542(6)   |
| C(8)-C(7)#2                    | 1.727(5)   | C(8)-C(7)#2                    | 1.788(7)   |
| C(9)-C(12)#2                   | 1.541(4)   | C(9)-C(12)#2                   | 1.556(6)   |
| N(2)-C(10)                     | 1.40(2)    | N(2)-C(10)                     | 1.42(2)    |
| N(2)-C(11)                     | 1.416(19)  | N(2)-C(11)                     | 1.365(17)  |
| N(2)-C(12)                     | 1.61(2)    | N(2)-C(12)                     | 1.673(19)  |
| C(10)-C(7)#2                   | 1.542(4)   | C(10)-C(7)#2                   | 1.540(5)   |
| C(11)-C(8)#2                   | 1.537(5)   | C(11)-C(8)#2                   | 1.542(6)   |
| C(12)-C(9)#2                   | 1.541(4)   | C(12)-C(9)#2                   | 1.556(6)   |
| O(1)-C(1)-C(6)                 | 123.16(12) | O(1)-C(1)-C(6)                 | 118.2(2)   |
| O(1)-C(1)-C(2)                 | 117.83(12) | O(1)-C(1)-C(2)                 | 123.0(2)   |
| C(6)-C(1)-C(2)                 | 119.01(13) | C(6)-C(1)-C(2)                 | 118.8(3)   |
| C(3)-C(2)-C(1)                 | 120.32(13) | C(3)-C(2)-C(1)                 | 120.4(2)   |
| C(2)-C(3)-C(4)                 | 121.65(12) | C(2)-C(3)-C(4)                 | 121.8(2)   |
| C(5)-C(4)-C(3)                 | 117.21(11) | C(5)-C(4)-C(3)                 | 116.9(2)   |
| C(5)-C(4)-C(4)#1               | 121.99(8)  | C(5)-C(4)-C(4)#1               | 122.22(18) |
| C(3)-C(4)-C(4)#1               | 120.81(8)  | C(3)-C(4)-C(4)#1               | 120.85(16) |
| C(6)-C(5)-C(4)                 | 121.42(12) | C(6)-C(5)-C(4)                 | 121.8(2)   |
| C(1)-C(6)-C(5)                 | 120.38(12) | C(1)-C(6)-C(5)                 | 120.2(2)   |

|                     |           |                     |           |
|---------------------|-----------|---------------------|-----------|
| C(7)-N(1)-C(8)      | 116.6(10) | C(7)-N(1)-C(8)      | 119.7(12) |
| C(7)-N(1)-C(9)      | 103.8(10) | C(7)-N(1)-C(9)      | 100.1(9)  |
| C(8)-N(1)-C(9)      | 103.1(11) | C(8)-N(1)-C(9)      | 104.3(13) |
| N(1)-C(7)-C(10)#2   | 112.0(6)  | N(1)-C(7)-C(10)#2   | 111.6(7)  |
| N(1)-C(7)-C(8)#2    | 97.5(7)   | N(1)-C(7)-C(8)#2    | 98.7(8)   |
| C(10)#2-C(7)-C(8)#2 | 33.17(17) | C(10)#2-C(7)-C(8)#2 | 42.0(3)   |
| N(1)-C(8)-C(11)#2   | 111.4(5)  | N(1)-C(8)-C(11)#2   | 112.9(8)  |
| N(1)-C(8)-C(7)#2    | 94.5(7)   | N(1)-C(8)-C(7)#2    | 87.0(8)   |
| C(11)#2-C(8)-C(7)#2 | 35.01(17) | C(11)#2-C(8)-C(7)#2 | 45.7(3)   |
| C(12)#2-C(9)-N(1)   | 108.6(4)  | C(12)#2-C(9)-N(1)   | 106.8(6)  |
| C(10)-N(2)-C(11)    | 114.9(13) | C(10)-N(2)-C(11)    | 117.5(14) |
| C(10)-N(2)-C(12)    | 104.7(10) | C(10)-N(2)-C(12)    | 101.5(8)  |
| C(11)-N(2)-C(12)    | 103.3(12) | C(11)-N(2)-C(12)    | 104.2(13) |
| N(2)-C(10)-C(7)#2   | 112.0(6)  | N(2)-C(10)-C(7)#2   | 111.3(8)  |
| N(2)-C(10)-C(11)#2  | 98.1(7)   | N(2)-C(10)-C(11)#2  | 118.1     |
| N(2)-C(11)-C(8)#2   | 112.1(6)  | N(2)-C(11)-C(8)#2   | 111.6(7)  |

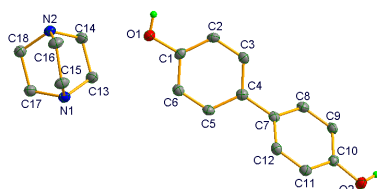

Temperature = 120 K (LT phase)

|             |            |                   |            |
|-------------|------------|-------------------|------------|
| N(1)-C(13)  | 1.473(2)   | C(16)-N(2)-C(18)  | 108.07(13) |
| N(1)-C(15)  | 1.473(2)   | C(14)-N(2)-C(18)  | 108.42(13) |
| N(1)-C(17)  | 1.485(2)   | O(1)-C(1)-C(6)    | 117.25(14) |
| N(2)-C(16)  | 1.469(2)   | O(1)-C(1)-C(2)    | 123.63(14) |
| N(2)-C(14)  | 1.473(2)   | C(6)-C(1)-C(2)    | 119.12(15) |
| N(2)-C(18)  | 1.481(2)   | C(3)-C(2)-C(1)    | 120.29(15) |
| O(1)-C(1)   | 1.3614(19) | C(2)-C(3)-C(4)    | 121.33(15) |
| O(2)-C(10)  | 1.3584(19) | C(3)-C(4)-C(5)    | 117.37(14) |
| C(1)-C(6)   | 1.390(2)   | C(3)-C(4)-C(7)    | 122.19(14) |
| C(1)-C(2)   | 1.395(2)   | C(5)-C(4)-C(7)    | 120.43(14) |
| C(2)-C(3)   | 1.384(2)   | C(6)-C(5)-C(4)    | 121.64(15) |
| C(3)-C(4)   | 1.399(2)   | C(5)-C(6)-C(1)    | 120.24(15) |
| C(4)-C(5)   | 1.402(2)   | C(8)-C(7)-C(12)   | 117.13(15) |
| C(4)-C(7)   | 1.480(2)   | C(8)-C(7)-C(4)    | 121.67(14) |
| C(5)-C(6)   | 1.379(2)   | C(12)-C(7)-C(4)   | 121.18(14) |
| C(7)-C(8)   | 1.394(2)   | C(9)-C(8)-C(7)    | 121.72(15) |
| C(7)-C(12)  | 1.404(2)   | C(8)-C(9)-C(10)   | 120.18(15) |
| C(8)-C(9)   | 1.382(2)   | O(2)-C(10)-C(11)  | 118.29(14) |
| C(9)-C(10)  | 1.398(2)   | O(2)-C(10)-C(9)   | 122.72(14) |
| C(10)-C(11) | 1.390(2)   | C(11)-C(10)-C(9)  | 118.99(15) |
| C(11)-C(12) | 1.380(2)   | C(12)-C(11)-C(10) | 120.23(15) |

---

|                  |            |                  |            |
|------------------|------------|------------------|------------|
| C(13)-C(14)      | 1.542(2)   | C(11)-C(12)-C(7) | 121.70(15) |
| C(15)-C(16)      | 1.545(2)   | N(1)-C(13)-C(14) | 110.31(13) |
| C(17)-C(18)      | 1.544(2)   | N(2)-C(14)-C(13) | 110.45(13) |
| C(13)-N(1)-C(15) | 108.63(13) | N(1)-C(15)-C(16) | 110.47(13) |
| C(13)-N(1)-C(17) | 107.83(13) | N(2)-C(16)-C(15) | 110.27(13) |
| C(15)-N(1)-C(17) | 108.34(13) | N(1)-C(17)-C(18) | 110.46(13) |
| C(16)-N(2)-C(14) | 109.02(13) | N(2)-C(18)-C(17) | 109.86(13) |

---
